# Supplementary material
Source: PubMed Central journal article supplement (PMC6072011)
Supplement: EHP2777.s001.acco.pdf [file EHP2777.s001.acco.pdf]

**Note to readers with disabilities:** *EHP* strives to ensure that all journal content is accessible to all readers. However, some figures and Supplemental Material published in *EHP* articles may not conform to [508 standards](#) due to the complexity of the information being presented. If you need assistance accessing journal content, please contact [ehp508@niehs.nih.gov](mailto:ehp508@niehs.nih.gov). Our staff will work with you to assess and meet your accessibility needs within 3 working days.

### **Supplemental Material**

#### **Identifying Vulnerable Periods of Neurotoxicity to Triclosan Exposure in Children**

Medina S. Jackson-Browne, George D. Papandonatos, Aimin Chen, Antonia M. Calafat, Kimberly Yolton, Bruce P. Lanphear, and Joseph M. Braun

#### **Table of Contents**

**Table S1.** Distribution of HOME Study Participant's Age (in months) at Child Urine Sample Collections from Ages 12 through 96 months.

**Table S2.** Average, standard deviation, and coefficients of variation of low and high concentration quality control samples included in analytic runs at the Centers for Disease Control and Prevention from 2005-2014.

**Table S3.** Baseline Characteristics of HOME Study Participants and Those Included in the Present Analysis.

**Table S4.** Univariate Statistics of Repeated Maternal and Child Urinary Triclosan Concentrations (ng/mL) for HOME Study Participants.

**Table S5.** Unadjusted and Adjusted Differences (95% CI) in FSIQ and Subscale Scores at Age 8-Years per 10-Fold Increase in Gestational and Childhood Urinary Triclosan Concentrations.

**Table S6.** Adjusted Differences in FSIQ (95% CI) and Subscale Scores at Age 8-Years per 10-Fold Increase in Gestational and Childhood Urinary Triclosan Concentrations.

**Figure S1.** Directed Acyclic Graph.

**Figure S2.** Adjusted Differences in Child FSIQ Scores at Age 8-Years per 10-Fold Increase in Gestational and Childhood Urinary Triclosan Concentrations after Adjusting for (A) NICU Admission and (B) Delivery Hospital.

**Table S1:** Distribution of HOME Study Participant's Age (in months) at Child Urine Sample Collections from Ages 12 through 96 months.

| <b>Exposure Period</b> | <b>N</b> | <b>Mean (Range)</b> |
|------------------------|----------|---------------------|
| <b>12 months</b>       | 174      | 13 (11, 19)         |
| <b>24 months</b>       | 155      | 25 (22, 28)         |
| <b>36 months</b>       | 159      | 37 (35, 43)         |
| <b>48 months</b>       | 128      | 50 (47,56)          |
| <b>60 months</b>       | 156      | 62 (57, 72)         |
| <b>96 months</b>       | 198      | 98 (90, 120)        |

**Table S2:** Average, standard deviation, and coefficients of variation of low and high concentration quality control samples included in analytic runs at the Centers for Disease Control and Prevention from 2005-2014.

| Year      | QC Concentration | N  | Start date | End date | Mean TCS | STD of TCS | % CV | Website with details on QC methods                                                                                                                                            |
|-----------|------------------|----|------------|----------|----------|------------|------|-------------------------------------------------------------------------------------------------------------------------------------------------------------------------------|
| 2013-2014 | High             | 67 | 6/19/14    | 11/3/15  | 49.3     | 2.6        | 5.2  | <a href="https://wwwn.cdc.gov/nchs/data/nhanes/2013-2014/labmethods/EPHPP_H_MET.pdf">https://wwwn.cdc.gov/nchs/data/nhanes/2013-2014/labmethods/EPHPP_H_MET.pdf</a>           |
| 2013-2014 | low              | 67 | 6/19/14    | 11/3/15  | 16.6     | 1.5        | 9.0  |                                                                                                                                                                               |
| 2011-2012 | high             | 66 | 4/4/12     | 3/27/13  | 67.9     | 2.9        | 4.2  | <a href="http://www.cdc.gov/nchs/data/nhanes/nhanes_11_12/EPH_G_met.pdf">http://www.cdc.gov/nchs/data/nhanes/nhanes_11_12/EPH_G_met.pdf</a>                                   |
| 2011-2012 | low              | 66 | 4/4/12     | 3/27/13  | 22.7     | 1.2        | 5.2  |                                                                                                                                                                               |
| 2009-2010 | high             | 73 | 7/19/10    | 6/27/11  | 25.2     | 2.4        | 9.3  | <a href="http://www.cdc.gov/nchs/data/nhanes/nhanes_09_10/EPH_F_met_phenols_parabens.pdf">http://www.cdc.gov/nchs/data/nhanes/nhanes_09_10/EPH_F_met_phenols_parabens.pdf</a> |
| 2009-2010 | low              | 73 | 7/19/10    | 6/27/11  | 65.4     | 3.9        | 5.9  |                                                                                                                                                                               |
| 2007-2008 | high             | 62 | 5/7/08     | 2/9/09   | 25.3     | 1.2        | 6.9  | <a href="http://www.cdc.gov/nchs/data/nhanes/nhanes_07_08/eph_e_met_phenols_parabens.pdf">http://www.cdc.gov/nchs/data/nhanes/nhanes_07_08/eph_e_met_phenols_parabens.pdf</a> |
| 2007-2008 | low              | 61 | 5/7/08     | 2/9/09   | 65.8     | 3.4        | 5.2  |                                                                                                                                                                               |
| 2005-2006 | high             | 66 | 6/20/06    | 2/8/07   | 26.1     | 2.5        | 9.6  | <a href="http://www.cdc.gov/nchs/data/nhanes/nhanes_05_06/eph_d_met_phenols_parabens.pdf">http://www.cdc.gov/nchs/data/nhanes/nhanes_05_06/eph_d_met_phenols_parabens.pdf</a> |
|           | low              | 66 | 6/20/06    | 2/8/07   | 63.5     | 5.4        | 8.4  |                                                                                                                                                                               |

**Table S3:** Baseline Characteristics of HOME Study Participants and Those Included in the Present Analysis.

|                                           | <b>Full Cohort<br/>[n=389] N (%)</b> | <b>Analysis Cohort<br/>[n=198] N (%)</b> |
|-------------------------------------------|--------------------------------------|------------------------------------------|
| <b>Child Sex</b>                          |                                      |                                          |
| Female                                    | 205 (53)                             | 110 (56)                                 |
| Male                                      | 179 (47)                             | 88 (44)                                  |
| Missing                                   | 5 (1.3)                              |                                          |
| <b>Race/Ethnicity</b>                     |                                      |                                          |
| White                                     | 233 (61)                             | 124 (62)                                 |
| Black                                     | 121 (32)                             | 64 (34)                                  |
| Other                                     | 25 (7)                               | 10 (4)                                   |
| Missing                                   | 5 (1.3)                              |                                          |
| <b>Maternal Education</b>                 |                                      |                                          |
| College Graduate or More                  | 187 (49)                             | 95 (48)                                  |
| Some College                              | 97 (26)                              | 57 (29)                                  |
| High School or less                       | 95 (25)                              | 46 (23)                                  |
| Missing                                   | 10 (2.6)                             |                                          |
| <b>Household Income</b>                   |                                      |                                          |
| >\$80K                                    | 100 (26)                             | 53 (27)                                  |
| \$40-80K                                  | 126 (33)                             | 65 (33)                                  |
| \$20-40K                                  | 65 (17)                              | 31 (15)                                  |
| <\$20K                                    | 88 (23)                              | 49 (24)                                  |
| Missing                                   | 10 (2.6)                             |                                          |
| <b>Marital Status</b>                     |                                      |                                          |
| Married                                   | 240 (63)                             | 126 (64)                                 |
| Unmarried                                 | 144 (38)                             | 72 (36)                                  |
| Missing                                   | 10 (2.6)                             |                                          |
| <b>Caregiving Environment<sup>a</sup></b> |                                      |                                          |
| <35                                       | 60 (18)                              | 40 (20)                                  |
| 35 - 40                                   | 79 (24)                              | 53 (27)                                  |
| >40                                       | 190 (58)                             | 105 (53)                                 |
| Missing                                   | 49 (13)                              |                                          |
| <b>Maternal FSIQ</b>                      |                                      |                                          |
| <96                                       | 89 (26)                              | 58 (29)                                  |
| 96-109                                    | 89 (26)                              | 47 (24)                                  |
| <109-117                                  | 80 (23)                              | 42 (21)                                  |
| > 117                                     | 82 (24)                              | 51 (26)                                  |
| Missing                                   | 49 (13)                              |                                          |
| <b>NICU</b>                               |                                      |                                          |
| Yes                                       | 17 (4)                               | 9 (5)                                    |
| No                                        | 367 (96)                             | 189 (95)                                 |
| Missing                                   | 5 (1.3)                              |                                          |
| <b>Serum Cotinine (ng/mL)<sup>b</sup></b> |                                      |                                          |
| < LOD (Unexposed)                         | 149 (39)                             | 88 (44)                                  |
| LOD-3.0 (SHS)                             | 192 (50)                             | 92 (47)                                  |
| > 3.0 (Active)                            | 43 (11)                              | 18 (9)                                   |
| Missing                                   | 5 (1.3)                              |                                          |

Abbreviations: NICU-neonatal intensive care unit, SHS-secondhand smoke, LOD-limit of detection.

a- Administered at age 1, higher scores indicate greater quality and quantity of caregiving.

b- LOD= 0.015 ng/mL. Threshold of 3 ng/mL for active smoking was chosen based on results from the 1999-2004 National Health and Nutrition Examination Survey which compared self-reported smoking status and serum cotinine levels among a representative sample of the US population (Benowitz et al. 2009).

**Table S4:** Univariate Statistics of Repeated Maternal and Child Urinary Triclosan Concentrations (ng/mL) for HOME Study Participants.

| <b>Exposure Period</b>            | <b>N</b> | <b>Min</b> | <b>5th</b> | <b>25th</b> | <b>Median</b> | <b>75th</b> | <b>95th</b> | <b>Max</b> |
|-----------------------------------|----------|------------|------------|-------------|---------------|-------------|-------------|------------|
| <b>16 Weeks</b>                   | 198      | < LOD      | < LOD      | 6.5         | 23            | 72          | 576         | 1784       |
| <b>26 Weeks</b>                   | 192      | < LOD      | < LOD      | 4.6         | 16            | 41          | 365         | 1657       |
| <b>Delivery</b>                   | 179      | < LOD      | < LOD      | 3.5         | 13            | 44          | 229         | 2013       |
| <b>Gestational GM<sup>a</sup></b> | 198      | < LOD      | 3.0        | 6.6         | 17            | 37          | 197         | 638        |
| <b>1 Year</b>                     | 174      | < LOD      | < LOD      | < LOD       | 5             | 10          | 46          | 118        |
| <b>2 Year</b>                     | 155      | < LOD      | < LOD      | 2.5         | 9             | 19          | 119         | 7487       |
| <b>3 Year</b>                     | 159      | < LOD      | < LOD      | 5.6         | 17            | 45          | 301         | 1194       |
| <b>4 Year</b>                     | 128      | < LOD      | < LOD      | 6.0         | 19            | 57          | 301         | 751        |
| <b>5 Year</b>                     | 156      | < LOD      | < LOD      | 7.0         | 16            | 39          | 155         | 515        |
| <b>8 Year</b>                     | 198      | < LOD      | < LOD      | 3.7         | 12            | 38          | 227         | 1610       |
| <b>Childhood GM<sup>a</sup></b>   | 198      | 1.4        | 2.8        | 4.2         | 13            | 22          | 51          | 911        |

Abbreviations: GM-geometric mean, LOD-limit of detection, min-minimum, and max- maximum.  
a-Gestational and childhood geometric mean urinary triclosan concentrations were calculated by averaging log<sub>10</sub>-transformed maternal (16 and 26 week and delivery) and child (age 1-8 years) urinary triclosan concentrations.

LOD= 0.015 ng/mL. Threshold of 3 ng/mL for active smoking was chosen based on results from the 1999-2004 National Health and Nutrition Examination Survey which compared self-reported smoking status and serum cotinine levels among a representative sample of the US population (Benowitz et al. 2009).

**Table S5:** Unadjusted and Adjusted Differences (95% CI) in FSIQ and Subscale Scores at Age 8-Years per 10-Fold Increase in Gestational and Childhood Urinary Triclosan Concentrations.<sup>a</sup>

| Exp/<br>Pd  | Full Scale IQ  |                 | Verbal Comprehension |                 | Perceptual Reasoning |                 | Processing Speed |                | Working Memory  |                 |
|-------------|----------------|-----------------|----------------------|-----------------|----------------------|-----------------|------------------|----------------|-----------------|-----------------|
|             | Unadjusted     | Adjusted        | Unadjusted           | Adjusted        | Unadjusted           | Adjusted        | Unadjusted       | Adjusted       | Unadjusted      | Adjusted        |
| <b>16 W</b> | 1.1(-2.1,4.3)  | -0.5(-3.2,2.2)  | 2.0(-1.1,5.0)        | 0.3(-2.4,3.0)   | 1.5(-1.7,4.6)        | -0.1(-2.8,2.5)  | 1.2(-1.9,4.3)    | 0.7(-2.3,3.6)  | -1.6(-4.8,1.7)  | -2.5(-5.5,0.4)  |
| <b>26 W</b> | 1.3(-1.8,4.4)  | -0.4(-3.1,2.4)  | 3.6(0.7,6.4)         | 2.1(-0.3,4.5)   | 1.1(-2.1,4.4)        | -0.6(-3.5,2.4)  | -0.3(-3.5,2.9)   | -1.1(-4.3,2.1) | -1.6(-4.9,1.7)  | -2.5(-5.4,0.3)  |
| <b>Del</b>  | -1.1(-4.3,1.9) | -4.5(-7.0,-2.0) | -0.8(-4.0,2.5)       | -3.6(-6.0,-1.1) | -0.9(-4.1,2.3)       | -4.2(-7.0,-1.4) | 1.1(-1.7,3.8)    | -0.4(-3.2,2.4) | -3.3(-6.5,-0.1) | -5.5(-8.4,-2.6) |
| <b>1 Y</b>  | 3.4(-1.3,8.1)  | -1.0(-5.2,3.2)  | 3.6(-1.0,8.2)        | -0.5(-4.6,3.5)  | 2.8(-1.7,7.4)        | -0.9(-4.9,3.0)  | 1.9(-3.0,6.8)    | 0.1(-4.5,4.7)  | 2.0(-3.0,6.9)   | -1.2(-5.8,3.4)  |
| <b>2 Y</b>  | -1.3(-5.0,2.5) | -1.3(-4.3,1.6)  | 2.6(-1.2,6.4)        | 2.6(-0.5,5.7)   | -4.0(-8.0,0.0)       | -3.8(-6.9,-0.7) | -0.7(-4.2,2.9)   | -0.8(-4.1,2.6) | -2.6(-6.3,1.1)  | -2.9(-6.2,0.5)  |
| <b>3 Y</b>  | 3.1(-0.9,7.0)  | 0.8(-2.3,3.9)   | 3.4(-0.7,7.5)        | 1.2(-2.1,4.5)   | 3.9(-0.8,8.5)        | 1.5(-2.4,5.4)   | -0.3(-3.6,3.1)   | -1.3(-4.6,1.9) | 1.4(-2.6,5.3)   | 0.1(-3.5,3.8)   |
| <b>4 Y</b>  | 3.8(-0.4,7.9)  | 1.0(-2.3,4.2)   | 2.9(-1.1,6.9)        | 0.4(-2.9,3.7)   | 5.1(1.2,9.0)         | 2.4(-0.7,5.4)   | 0.5(-3.6,4.5)    | -0.8(-4.5,3.0) | 2.9(-1.4,7.2)   | 1.1(-2.5,4.8)   |
| <b>5 Y</b>  | 3.8(-0.7,8.3)  | 0.7(-2.8,4.2)   | 3.5(-0.9,8.0)        | 0.2(-3.4,3.8)   | 4.1(-0.4,8.5)        | 1.4(-1.8,4.5)   | 0.1(-4.0,4.2)    | -1.0(-4.7,2.6) | 3.0(-1.7,7.6)   | 1.1(-3.0,5.3)   |
| <b>8 Y</b>  | 3.1(-0.2,6.4)  | 0.7(-2.1,3.4)   | 3.3(-0.2,6.8)        | 1.1(-1.8,4.0)   | 3.5(0.4,6.6)         | 1.1(-1.4,3.7)   | -0.4(-3.1,2.4)   | -1.3(-3.9,1.3) | 1.9(-1.1,4.9)   | 0.3(-2.5,3.1)   |

Beta's and 95% CI derived from a multiple informants regression model.

Abbreviations: CI-confidence interval, FSIQ-full scale intelligence quotient, Exp/Pd- Exposure Period, W-weeks, Del-delivery, Y-year  
a-Adjusted for log<sub>10</sub> urinary creatinine and serum cotinine concentrations, child sex, child race/ethnicity, household income, marital status, maternal education, caregiving environment scores, and maternal FSIQ.

**Table S6.** Adjusted Differences in FSIQ (95% CI) and Subscale Scores at Age 8-Years per 10-Fold Increase in Gestational and Childhood Urinary Triclosan Concentrations.<sup>a</sup>

| Exp/<br>Pd  | Full Scale IQ   |                 | Verbal Comprehension |                | Perceptual Reasoning |                 | Processing Speed |                | Working Memory  |                 |
|-------------|-----------------|-----------------|----------------------|----------------|----------------------|-----------------|------------------|----------------|-----------------|-----------------|
|             | Female          | Male            | Female               | Male           | Female               | Male            | Female           | Male           | Female          | Male            |
| <b>16 W</b> | -0.5(-4.2,3.3)  | -0.5(-3.6,2.6)  | -0.3(-3.7,3.1)       | 1.3(-2.2,4.8)  | -0.5(-4.4,3.4)       | 0.5(-2.4,3.5)   | 2.0(-1.6,5.7)    | -1.4(-5.3,2.5) | -2.5(-6.7,1.6)  | -2.4(-5.8,1.1)  |
| <b>26 W</b> | 1.6(-2.7,5.9)   | -2.1(-5.3,-1.2) | 3.1(-0.2,6.5)        | 0.7(-3.0,4.5)  | 1.2(-3.0,5.5)        | -1.2(-4.7,2.3)  | 1.5(-3.7,6.6)    | -4.0(-7.7,0.3) | -2.4(-6.6,1.8)  | -2.5(-6.1,1.1)  |
| <b>Del</b>  | -3.6(-6.6,-0.6) | -4.5(-8.0,-1.0) | -4.9(-7.9,-1.9)      | -1.5(-5.0,2.1) | -3.2(-6.8,0.3)       | -4.7(-8.2,-1.1) | 3.3(-0.1,6.8)    | -3.2(-6.8,0.5) | -5.3(-8.9,-1.7) | -4.8(-8.7,-0.8) |
| <b>1 Y</b>  | 3.8(-1.0,8.5)   | -5.9(-12,-0.4)  | 2.7(-2.2,7.6)        | -5.8(-12,0.1)  | 1.0(-3.9,6.0)        | -3.8(-9.2,1.5)  | 5.9(0.0,11.9)    | -4.4(-11,1.7)  | 3.3(-2.1,8.6)   | -3.5(-9.5,2.4)  |
| <b>2 Y</b>  | -0.1(-3.4,3.1)  | -2.2(-7.2,2.8)  | 2.4(-1.1,5.9)        | 2.3(-2.9,7.4)  | -2.1(-5.5,1.2)       | -3.3(-7.8,-1.3) | 0.3(-3.7,4.4)    | -3.8(-9.8,2.1) | -2.0(-5.2,1.3)  | -2.7(-8.6,3.2)  |
| <b>3 Y</b>  | 0.0(-3.8,3.8)   | 1.4(-3.0,5.9)   | 0.0(-4.6,4.6)        | 2.6(-1.6,6.8)  | -1.0(-5.7,3.7)       | 3.6(-1.4,8.6)   | 0.8(-3.8,5.3)    | -3.5(-7.7,0.7) | -0.4(-4.7,3.8)  | 0.3(-5.4,6.0)   |
| <b>4 Y</b>  | 1.5(-2.6,5.5)   | 0.0(-4.6,4.6)   | 0.0(-4.9,4.9)        | -0.3(-4.5,3.9) | 1.2(-2.3,4.8)        | 3.1(-1.4,7.6)   | 1.8(-3.1,6.7)    | -3.2(-7.9,1.5) | 2.2(-1.5,5.9)   | 0.5(-5.1,5.9)   |
| <b>5 Y</b>  | 2.4(-1.8,6.5)   | -2.0(-7.4,3.4)  | -0.3(-5.1,4.4)       | -0.5(-5.5,4.4) | 2.0(-1.6,5.6)        | -0.1(-5.6,5.4)  | 2.4(-2.1,6.9)    | -5.7(-13,1.3)  | 3.1(-1.4,7.8)   | -0.9(-7.3,5.5)  |
| <b>8 Y</b>  | 0.4(-3.7,4.6)   | 0.5(-2.6,3.7)   | -1.3(-5.2,2.6)       | 2.4(-1.4,6.2)  | 1.1(-2.9,5.1)        | 1.1(-2.2,4.3)   | -0.6(-4.4,3.2)   | -1.4(-4.7,1.8) | 1.5(-2.3,5.2)   | -0.9(-4.5,2.6)  |

Beta's and 95% CI derived from a multiple informants regression model.

Abbreviations: FSIQ-full scale intelligence quotient, CI-confidence interval, Exp/Pd- Exposure Period, W-weeks, Del-delivery, Y-year.

a-Adjusted for log<sub>10</sub> urinary creatinine and serum cotinine concentrations, child race/ethnicity, household income, marital status, maternal education, caregiving environment scores, and maternal FSIQ.

Sex x triclosan x exposure period p-values = 0.4 (FSIQ), 0.2 (Verbal Comprehension), 0.8 (Perceptual Reasoning), 0.7 (Processing Speed), and 0.6 (Working Memory).

Figure S1. Directed Acyclic Graph

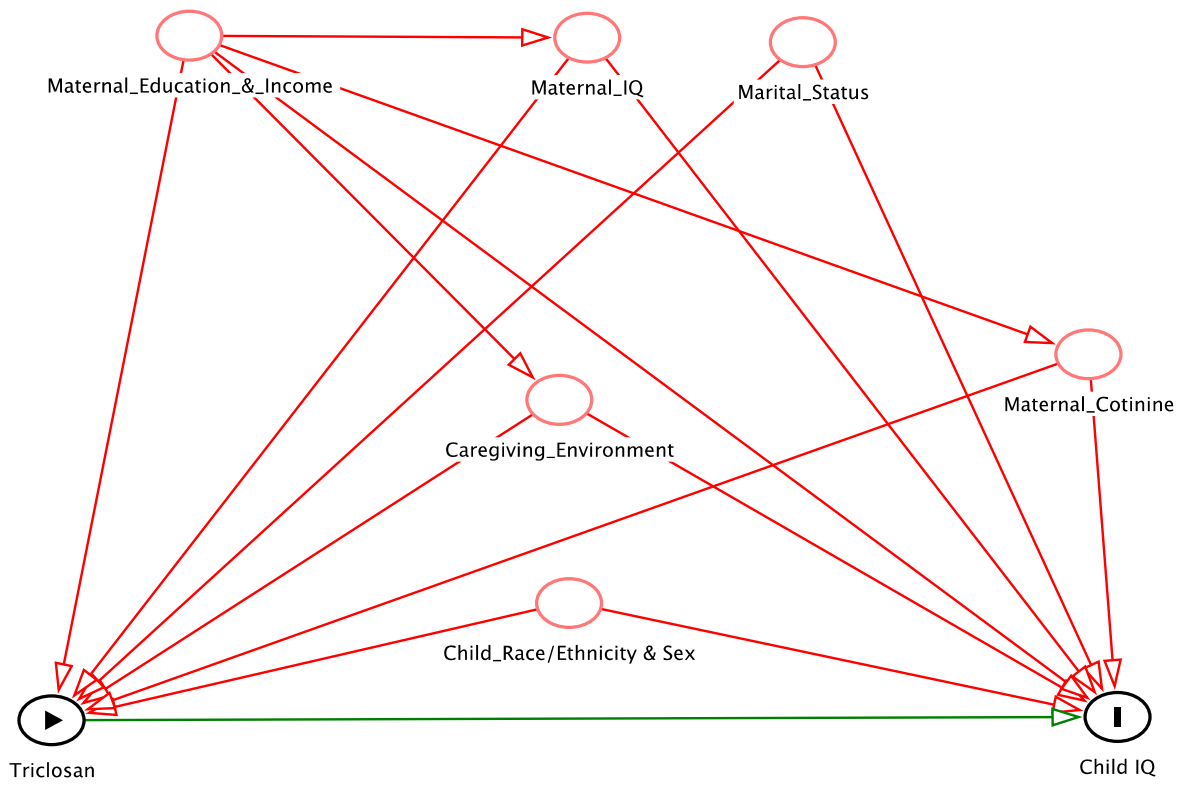



**Figure S2.** Adjusted Differences in Child FSIQ Scores at Age 8-Years per 10-Fold Increase in Gestational and Childhood Urinary Triclosan Concentrations after Adjusting for (A) NICU Admission and (B) Delivery Hospital.<sup>a,b,c</sup>

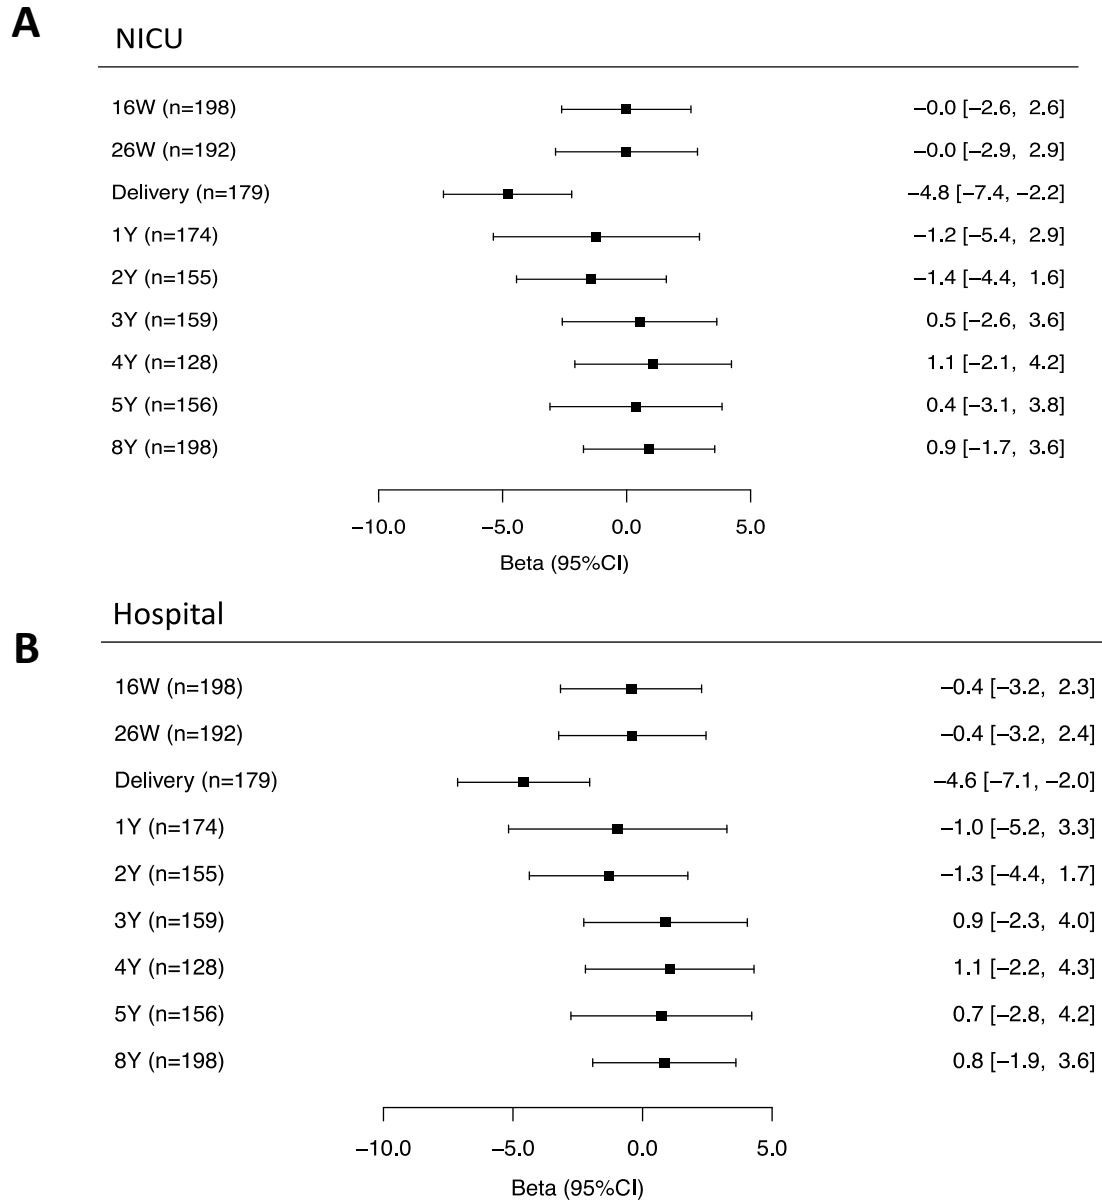

Betas and 95% confidence intervals derived from a multiple informants model.

Abbreviations: W-weeks of gestation, Y-age in years, FSIQ-full-scale intelligence quotient, CI-confidence interval, NICU-neonatal intensive care unit.

a-Multiple Informant regression model adjusted for log<sub>10</sub>-transformed urinary creatinine concentrations and serum cotinine concentrations (continuous), child sex (male vs. female), child race/ethnicity (White-non-Hispanic, Black-non, Hispanic, and other), household income (continuous), marital status (married vs. unmarried), maternal education (high school or less, some college, and college graduate or more), caregiving environment scores (continuous), and maternal FSIQ (continuous).

b-Error bars are 95% confidence intervals.

c-Urinary triclosan concentration by exposure period interaction term p-value = 0.01(NICU) and 0.03 (Delivery Hospital).
